# Supplementary material for: Experimental design and multi-objective optimization of molecularly imprinted polymers for monosaccharides
Source: Royal Society of Chemistry journal article supplement (doi:10.1039/c4ra00802b), 2014-01-01
Supplement: c4ra00802b1.pdf [file c4ra00802b1.pdf]

Table S1- Eigenvalues and related eigenvectors for components

| Component | Eigenvalue | Eigenvector |
|-----------|------------|-------------|
| PC1       | 1.7179     | -0.6954     |
|           |            | -0.7151     |
|           |            | 0.07095     |
| PC2       | 1.0945     | 0.2825      |
|           |            | -0.1813     |
|           |            | 0.9420      |
| PC3       | 0.1876     | 0.6608      |
|           |            | -0.6751     |
|           |            | -0.3281     |

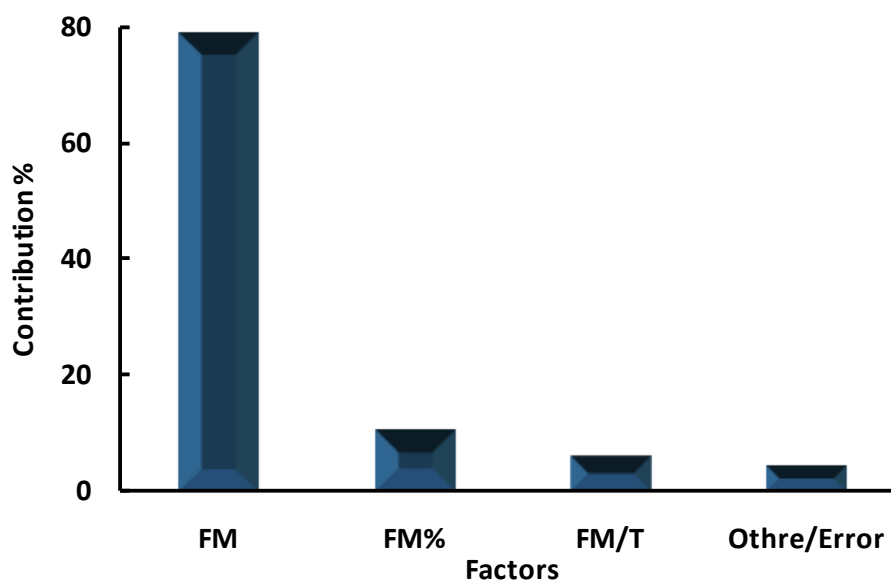

Figure S1 - Contributions of factors in overall performance of glucose MIP preparation
